# Supplementary material
Source: MDPI journal article supplement (https://www.mdpi.com/2071-1050/15/5/4538)
Supplement: s1 [file s1]

**Table S1.** Parameters, methodology and results of calculation economic efficiency of using the SRF during clinker firing

| №                                                                                                                                            | Parameters                                   | Limit value   | Symbol                         | Sources                        |
|----------------------------------------------------------------------------------------------------------------------------------------------|----------------------------------------------|---------------|--------------------------------|--------------------------------|
| 1                                                                                                                                            | Daily kiln production quantity               | 3056 ton/day  | KP                             | Cement plant of Lithuania [69] |
| 2                                                                                                                                            | Total operating day                          | 360 day/year  | TOD                            |                                |
| 3                                                                                                                                            | Emission factor of coal                      | 85%           | CA <sub>CO2</sub>              |                                |
| 4                                                                                                                                            | Energy required to produce one kg of clinker | 840 kcal/kg   | Ec                             | Hemidat at al. [22]            |
| 5                                                                                                                                            | The calorific value of coal                  | 7400 kcal/kg  | HCV <sub>coal</sub>            | CMI [70]                       |
| 6                                                                                                                                            | Price 1 ton of coal                          | 297 USD       | P <sub>coal</sub>              | Directive 2000/76/EC [71]      |
| 7                                                                                                                                            | The cost price of one-ton SRF                | 80 USD        | P <sub>SRF</sub>               | Del Zotto et al. [72]          |
| 8                                                                                                                                            | The calorific value of SRF                   | 3821 kcal/kg  | CV <sub>SRF</sub>              | Determined                     |
| 9                                                                                                                                            | Emission cost of one ton CO <sub>2</sub>     | 85 USD        | P <sub>CO2</sub>               | OECD [73]                      |
| 10                                                                                                                                           | Replacement ratio of SRF                     | 10%, 15%, 20% | RR                             |                                |
| 11                                                                                                                                           | Coal consumption by initial situation        | 16 t/h        | C <sup>0</sup> <sub>coal</sub> |                                |
| <b>Methodology of calculation</b>                                                                                                            |                                              |               |                                |                                |
| The energy consumption of coal to produce clinker tons per day, kcal/kg ( <i>E</i> ):                                                        |                                              |               |                                |                                |
| $En = KP \times 1000 \times Ec,$                                                                                                             |                                              |               |                                | (1)                            |
| The coal energy consumption savings by using the replacement ratio of SRF, kcal/kg ( <i>Esav</i> ):                                          |                                              |               |                                |                                |
| $Esav = En \times RR$                                                                                                                        |                                              |               |                                | (2)                            |
| The SRF amount to be replaced per hour to achieve the required energy, ton/h ( <i>ASRF</i> ):                                                |                                              |               |                                |                                |
| $A_{SRF} = (Esav / HCV_{SRF}) / 1000 / 24$                                                                                                   |                                              |               |                                | (3)                            |
| The coal amount per hour required to achieve the energy, ton/h ( <i>Ccoal</i> ):                                                             |                                              |               |                                |                                |
| $C_{coal} = (REn / CV_{coal}) / 1000 / 24$                                                                                                   |                                              |               |                                | (4)                            |
| where <i>RE</i> is the required energy to produce one kg of clinker taking into account the replacement ratio of SRF (kcal/kg):              |                                              |               |                                |                                |
| $REn = KP \times Ec_{calc} \times RR \times 1000$                                                                                            |                                              |               |                                | (5)                            |
| where <i>Ec<sub>calc</sub></i> is calculation energy required to produce 1 kg of clinker (kcal/kg):                                          |                                              |               |                                |                                |
| $Ec_{calc} = (Ec \times AC) / 100$                                                                                                           |                                              |               |                                | (6)                            |
| where <i>AC</i> is the coal consumption (t/h) and was calculated by Eq. 7:                                                                   |                                              |               |                                |                                |
| $AC = C_{coal}^0 - C_{coal}$                                                                                                                 |                                              |               |                                | (7)                            |
| where <i>C<sub>coal</sub></i> – coal consumption calculated by different replacement ratios of SRF (t/h).                                    |                                              |               |                                |                                |
| The amount of SRF required for replacing one ton of coal ( <i>QSRF</i> ) was:                                                                |                                              |               |                                |                                |
| $Q_{SRF} = A_{SRF} / AC$                                                                                                                     |                                              |               |                                | (8)                            |
| Using SRF as a replacement fuel, the annual coal savings, t/year ( <i>AS<sub>coal</sub></i> ), were calculated using Eq. 9:                  |                                              |               |                                |                                |
| $AS_{coal} = AC \times TOD \times 24$                                                                                                        |                                              |               |                                | (9)                            |
| The annual income in coal savings, USD/year ( <i>AI</i> ), was calculated by Eq. 10:                                                         |                                              |               |                                |                                |
| $AI = AS_{coal} \times P_{coal}$                                                                                                             |                                              |               |                                | (10)                           |
| The annual consumption of SRF, t/year ( <i>AC<sub>SRF</sub></i> ), was calculated using Eq. 11:                                              |                                              |               |                                |                                |
| $AC_{SRF} = A_{SRF} \times TOD \times 24$                                                                                                    |                                              |               |                                | (11)                           |
| By Eq. 12, the annual costs of SRF, USD/year ( <i>C<sub>SRF</sub></i> ), were calculated:                                                    |                                              |               |                                |                                |
| $C_{SRF} = AC_{SRF} \times P_{SRF}$                                                                                                          |                                              |               |                                | (12)                           |
| The actual financial savings, USD/year ( <i>FS</i> ), were calculated using Eq. 13:                                                          |                                              |               |                                |                                |
| $FS = AI - C_{SRF}$                                                                                                                          |                                              |               |                                | (13)                           |
| The annual CO <sub>2</sub> emission savings for the cement plant using coal, USD/year ( <i>CS<sub>CO2</sub></i> ), was calculated by Eq. 14: |                                              |               |                                |                                |
| $CS_{CO2} = AC \times CA_{CO2} \times TOD \times 24$                                                                                         |                                              |               |                                | (14)                           |
| Reducing CO <sub>2</sub> emissions from coal, USD/year ( <i>ES<sub>CO2</sub></i> ), was calculated using Eq. 15:                             |                                              |               |                                |                                |
| $ES_{CO2} = CS_{CO2} \times P_{CO2}$                                                                                                         |                                              |               |                                | (15)                           |
| Loss of efficiency taking into account the use of SRF, % ( <i>LEf</i> ), was calculated by Eq. 16:                                           |                                              |               |                                |                                |
| $LEf = 0.20 \times RR \times 100$                                                                                                            |                                              |               |                                | (16)                           |
| The net cost savings was calculated according to Eq. 17:                                                                                     |                                              |               |                                |                                |
| $NCS = \frac{(AI + ES_{CO2} - C_{SRF}) \times (100 - LEf)}{100}$                                                                             |                                              |               |                                | (17)                           |

| <b>Calculation results</b>                          |                          |                   |                   |                   |
|-----------------------------------------------------|--------------------------|-------------------|-------------------|-------------------|
| <b>Parameter</b>                                    | <b>Current situation</b> | <b>Scenario 1</b> | <b>Scenario 2</b> | <b>Scenario 3</b> |
| SRF replacement ratio (%)                           |                          | 10                | 15                | 20                |
| Coal consumption ratio (%)                          | 100                      | 90                | 85                | 80                |
| Coal consumption, (t/h)                             | 16                       | 11.7              | 10.4              | 9.25              |
| SRF consumption, (t/h)                              |                          | 2.51              | 3.56              | 4.47              |
| Replacement ratio to substitute 1 t of coal         |                          | 1:0.58            | 1:0.64            | 1:0.66            |
| Coal savings, (t/year)                              |                          | 37,084            | 48,012            | 58,314            |
| Coal savings, (USD/year)                            |                          | 11,014,170        | 14,259,567        | 17,319,514        |
| CO <sub>2</sub> emission saving in coal, (t/year)   |                          | 31,522            | 40,810            | 49,567            |
| CO <sub>2</sub> emission saving in coal, (USD/year) |                          | 2,679,373         | 3,468,867         | 4,213,248         |
| Net saving, (USD/year)                              |                          | 11,713,131        | 14,803,652        | 17,699,517        |
